# Supplementary material for: A database and tool, IM Browser, for exploring and integrating emerging gene and protein interaction data for Drosophila
Source: Springer Nature journal article supplement (doi:10.1186/1471-2105-7-195), 2006-04-07

### Fly Gene Attributes

FlyBase\_ID (FK)

Symbol  
Full\_name  
secondaryFBgn  
Class\_of\_gene  
Date\_Last\_Update  
GO\_Molecular\_function  
GO\_Biological\_process  
GO\_Cellular\_component  
Protein\_domains  
Synonyms  
Cytogenetic\_map  
Protein\_sequences  
URL  
CG\_Symbol

### Fly Gene Expression\*

FlyBase\_ID

Tissue  
Developmental\_Stage

### Predicted Worm Interologs

FBgn\_Gene1  
FBgn\_Gene2

Gene1\_interactions\_as\_Gene1  
Gene1\_interactions\_total  
Gene2\_interactions\_as\_Gene2  
Gene2\_interactions\_total  
Screen  
Reference  
Date\_of\_record  
Interolog\_Method  
Data\_Version

### Predicted Yeast Interologs

FBgn\_Gene1  
FBgn\_Gene2

Gene1\_interactions\_as\_Gene1  
Gene1\_interactions\_total  
Gene2\_interactions\_as\_Gene2  
Gene2\_interactions\_total  
Screen  
Reference  
Date\_of\_record  
Interolog\_Method  
Data\_Version

### Genetic Interactions

FBgn\_Gene1\_BD  
FBgn\_Gene2\_AD

Gene1\_interactions\_as\_Gene1  
Gene1\_interactions\_total  
Gene2\_interactions\_as\_Gene2  
Gene2\_interactions\_total  
Screen  
Reference  
Release\_Date  
Data\_Version  
PMID  
URL\_PubMed

### Finley YTH

FBgn\_Gene1\_BD  
FBgn\_Gene2\_AD

-  
Gene1\_interactions\_as\_BD  
Gene1\_interactions\_total  
Gene2\_interactions\_as\_AD  
Gene2\_interactions\_total  
Screen  
Reference  
Release\_Date  
c\_leu  
c\_lacZ  
c\_Sum  
Confidence\_score  
Matrix  
IST  
Matrix\_detections  
ISTs\_RFCs  
Data\_Version

### Curagen YTH

FBgn\_Gene1\_BD  
FBgn\_Gene2\_AD

Gene1\_interactions\_as\_BD  
Gene1\_interactions\_total  
Gene2\_interactions\_as\_AD  
Gene2\_interactions\_total  
Screen  
Reference  
Release\_Date  
cdna  
collection  
hexpert  
yexpert  
cexpert  
Curagen\_confidence  
ISTs\_RFCs  
Data\_Version

### Hybrigenics YTH

FBgn\_Gene1\_BD  
FBgn\_Gene2\_AD

Gene1\_interactions\_as\_BD  
Gene1\_interactions\_total  
Gene2\_interactions\_as\_AD  
Gene2\_interactions\_total  
Screen  
Reference  
Release\_Date  
IST  
ISTs\_RFCs  
Data\_Version  
PMID  
URL\_PubMed

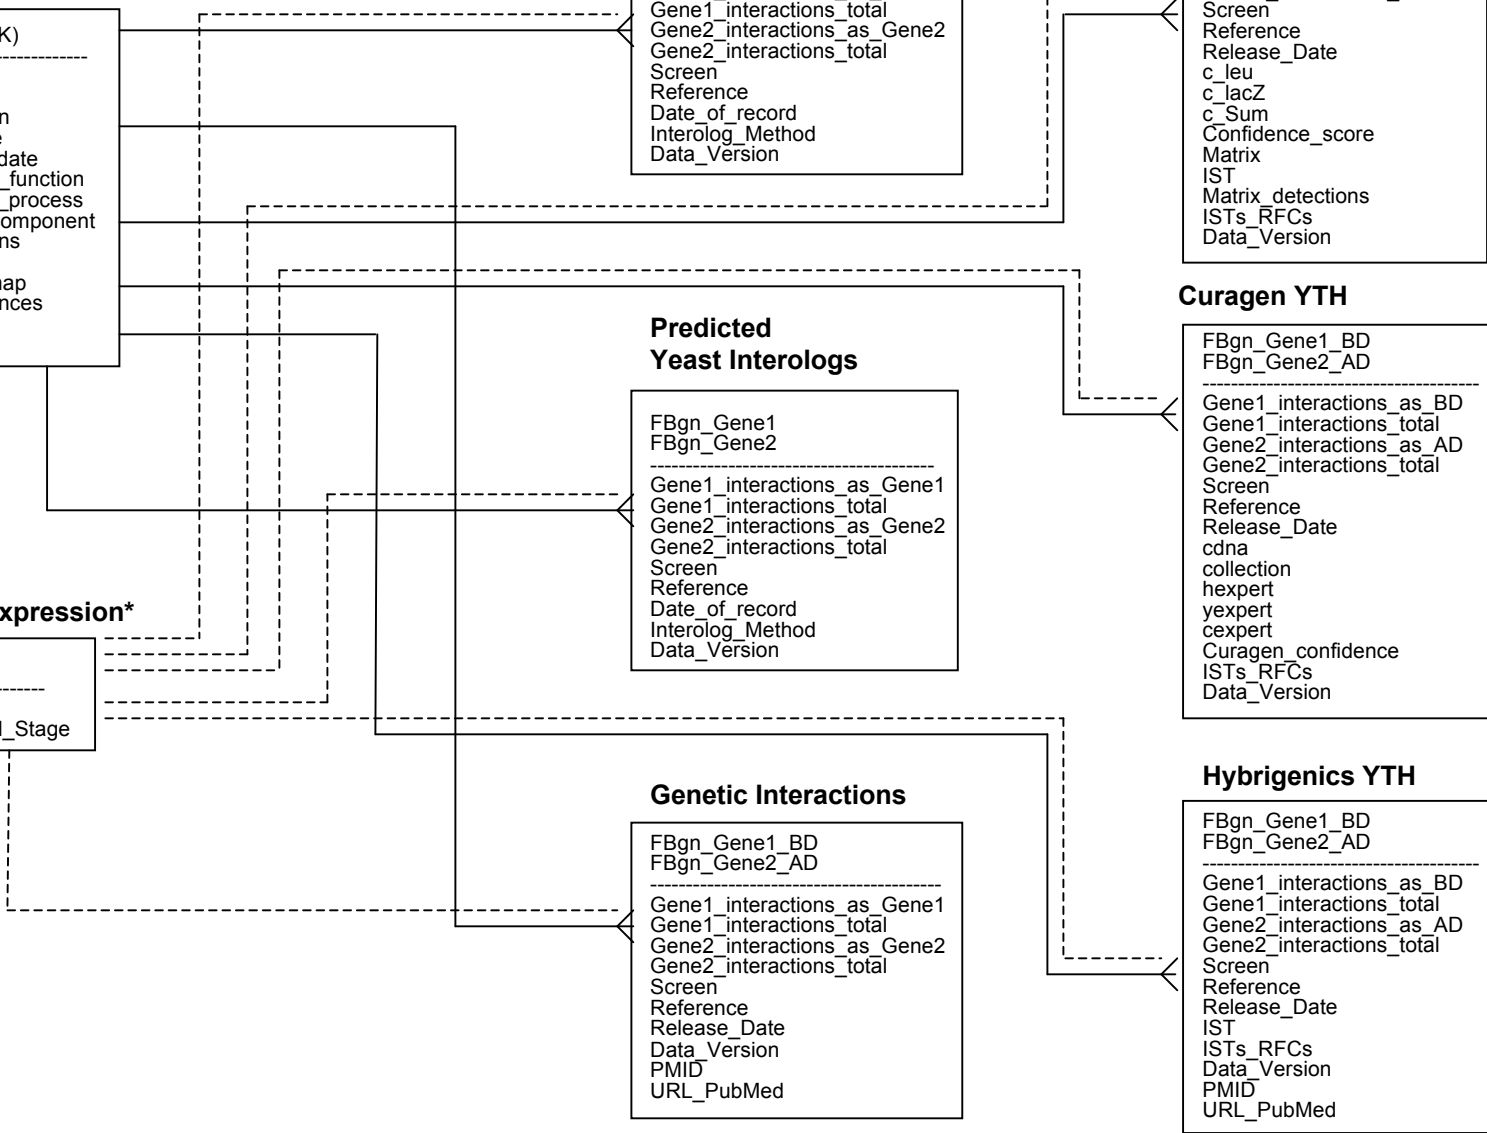

Supplement: 12859_2005_934_MOESM1_ESM.pdf [file 12859_2005_934_MOESM1_ESM.pdf]
