# Supplementary material for: A database and tool, IM Browser, for exploring and integrating emerging gene and protein interaction data for Drosophila
Source: Springer Nature journal article supplement (doi:10.1186/1471-2105-7-195), 2006-04-07
Supplement: 12859_2005_934_MOESM2_ESM.pdf [file 12859_2005_934_MOESM2_ESM.pdf]

## Table List

Genetic Interactions

Finley YTH

Worm Interologs

Curagen YTH

Hybrigenics YTH

Yeast Interologs

## Miscellaneous

Table name | Edge Color

|                |        |
|----------------|--------|
| *              | Red    |
| Genetic Int... | Yellow |
| Finley YTH     | Blue   |
| Worm Inter...  | Green  |
| Curagen Y...   | Cyan   |
| Hybrigenic...  | Black  |
| Yeast Inter... | Purple |

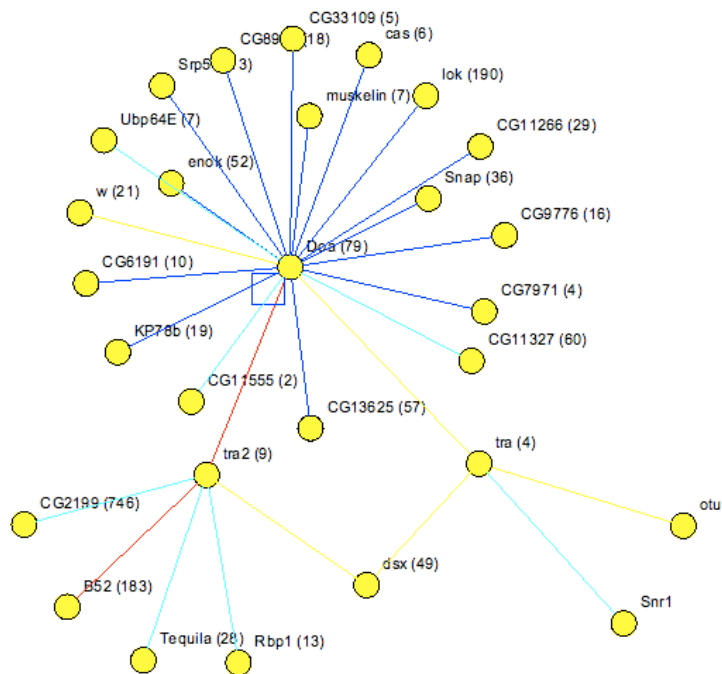

## Message Board

Graph with 28 nodes and 29 edges build... Laying graph... Please wait... Done.
