# Supplementary material for: A database and tool, IM Browser, for exploring and integrating emerging gene and protein interaction data for Drosophila
Source: Springer Nature journal article supplement (doi:10.1186/1471-2105-7-195), 2006-04-07
Supplement: 12859_2005_934_MOESM4_ESM.pdf [file 12859_2005_934_MOESM4_ESM.pdf]

## Table List

Genetic Interactions  
 Finley YTH  
 Worm Interologs  
 Curagen YTH  
 Hybrigenics YTH  
 Yeast Interologs

## Miscellaneous

| Table name      | Edge Color                                                                        |
|-----------------|-----------------------------------------------------------------------------------|
| *               |  |
| Genetic Inte... |  |
| Finley YTH      |  |
| Worm Inter...   |  |
| Curagen YTH     |  |
| Hybrigenics...  |  |
| Yeast Inter...  |  |

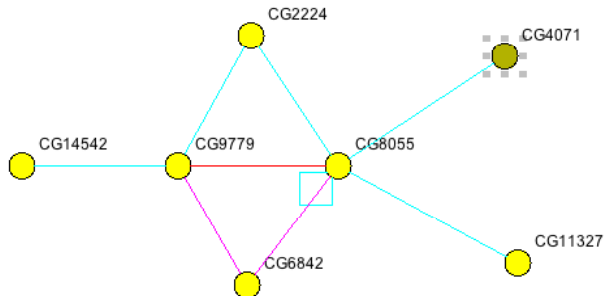

## Message Board

0 record(s) received from table Hybrigenics YTH  
 2 record(s) received from table Yeast Interologs  
 0 nodes and 1 edges added to the graph  
 Graph with 7 nodes and 9 edges build... Laying graph... Please wait... Done.
