# Supplementary material for: A database and tool, IM Browser, for exploring and integrating emerging gene and protein interaction data for Drosophila
Source: Springer Nature journal article supplement (doi:10.1186/1471-2105-7-195), 2006-04-07

**A.**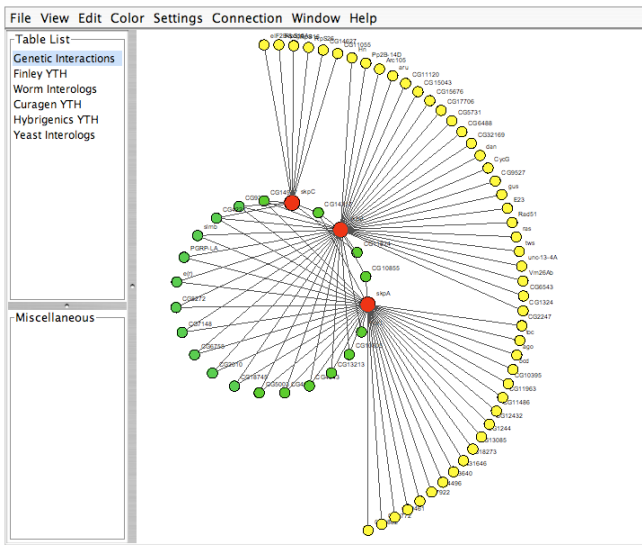**B.**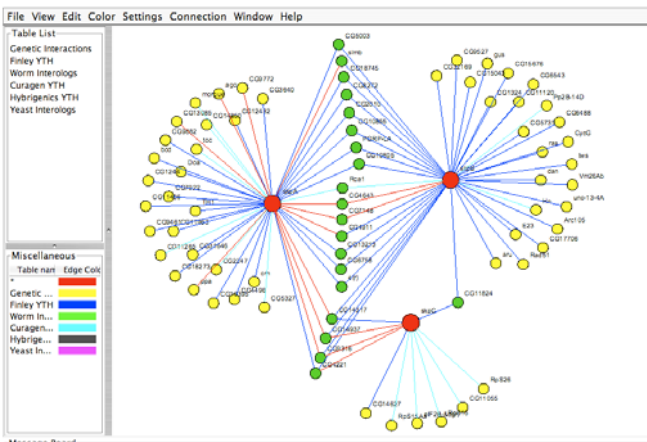**C.**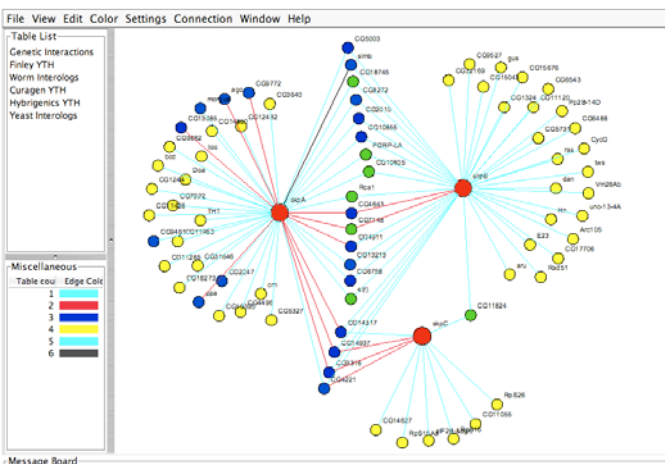

Supplement: 12859_2005_934_MOESM5_ESM.pdf [file 12859_2005_934_MOESM5_ESM.pdf]
